# Supplementary material for: Single-cell metabolite profiling enables information-rich classification of lymphocyte types and subtypes
Source: Royal Society of Chemistry journal article supplement (doi:10.1039/d3cc05011d), 2023-12-06
Supplement: d3cc05011d11.pdf [file d3cc05011d11.pdf]

## Supplementary Information

### Single-cell metabolite profiling enables information-rich classification of lymphocyte types and subtypes

Siyuan Pan,<sup>a</sup> Changyi Liu,<sup>b</sup> Huan Yao,<sup>c</sup> Xingyu Pan,<sup>a</sup> Jinhang Li,<sup>d</sup> Jinlei Yang,<sup>a</sup> Murong Du,<sup>a</sup> Peng Liu,<sup>\*b</sup> Sichun Zhang<sup>\*a</sup> and Xinrong Zhang<sup>a</sup>

<sup>a</sup>. Department of Chemistry, Tsinghua University, Beijing 100084, P.R. China. E-mail:  
sczhang@mail.tsinghua.edu.cn

<sup>b</sup>. State Key Laboratory of Complex, Severe, and Rare Diseases, Peking Union Medical College Hospital, Beijing 100730, P.R. China. Email: liupeng@pumch.cn

<sup>c</sup>. Division of Chemical Metrology and Analytical Science, National Institute of Metrology, Beijing 100029, P.R.China.

<sup>d</sup>. Key Laboratory of Analytical Chemistry for Living Biosystems, Institute of Chemistry, Chinese Academy of Sciences, Beijing 100190, P.R.China.

## Table of Contents

|                                                 |    |
|-------------------------------------------------|----|
| 1. Experimental Section .....                   | 3  |
| 1.1 Ethics Approval .....                       | 3  |
| 1.2 Chemical Reagents .....                     | 3  |
| 1.3 FCM Sorting of Lymphocytes .....            | 3  |
| 1.4 Device Configuration and Optimization ..... | 3  |
| 1.5 Data Processing .....                       | 4  |
| 1.6 Metabolites Annotation and Analysis .....   | 5  |
| 2. Supplementary Figures .....                  | 5  |
| 3. Supplementary Tables .....                   | 10 |

# 1. Experimental Section

## 1.1 Ethics Approval

This research complies with all relevant ethical regulations. The study of human samples was performed according to the Declaration of Helsinki and Good Clinical Practice and approved by the Ethical Committee of Peking Union Medical College Hospital (grant no. I-23PJ1876). Informed written consent was obtained from all participants.

## 1.2 Chemical Reagents

Methanol (HPLC/UHPLC-UV grade) was purchased from Fisher Chemical. Ammonium formate (for LC-MS, ≥99.0%) was purchased from Sigma-Aldrich. PBMCs Ficoll was purchased from Dayou. RPMI 1640 medium and Dulbecco's phosphate buffered saline (DPBS) were purchased from Gibco Life Technologies. Ultrapure water (resistance ≥18 MΩ/cm) was prepared from the Milli-Q water purification system.

CD3 monoclonal antibody (OKT3), CD19 monoclonal antibody (HIB19), CD56 (NCAM) monoclonal antibody (CMSSB), CD14 monoclonal antibody (61D3), CD16 monoclonal antibody (eBioCB16 (CB16)) and LIVE/DEAD kit were all purchased from eBioscience. CD4 monoclonal antibody (A161A1) and CD8 monoclonal antibody (SK1) were purchased from Biolegend.

## 1.3 FCM Sorting of Lymphocytes

Whole blood was obtained from the volunteers and mixed with an equal volume of DPBS. PBMCs Ficoll was added to the blood sample and centrifuged. After obtaining the layered sample, the PBMCs layer was collected and washed with DPBS by centrifugation twice. In PBMCs study, CD3 antibody, CD19 antibody, CD56 antibody, CD14 antibody and CD16 antibody were used for staining. In lymphocyte study, CD3 antibody, CD19 antibody, CD56 antibody, CD4 antibody and CD8 antibody were used for staining. LIVE/DEAD kit was used to detect the viability of cells. Samples were incubated in the dark for 30 minutes and washed, then resuspended in RPMI 1640 medium and transferred to flow cytometry tubes for FCM. A Moflo EQ flow cytometer from Beckman was used. The samples were first compensated using single stained samples and then sorted. Live cells were gated by forward scatter (FSC), side scatter (SSC) and LIVE/DEAD kit. T cells and B cells were gated by CD3<sup>+</sup> and CD19<sup>+</sup>, respectively. NK cells were gated from CD3<sup>-</sup> CD19<sup>-</sup> cells by CD56<sup>+</sup>. Monocytes were gated as CD14<sup>+</sup>CD16<sup>+</sup> cells from live cells. T cell subtypes were discriminated by CD4<sup>+</sup>CD8<sup>-</sup> and CD8<sup>+</sup>CD4<sup>-</sup> from T cells. Sorted cells were resuspended in ammonium formate solution (140 mM) and small molecules in the medium were removed by centrifugation twice. The concentration of the cell suspension before MS detection was controlled at 5×10<sup>4</sup> cells/mL.

## 1.4 Device Configuration and Optimization

The device consists of three parts: cell sampling system, online extraction system and MS analysis system. The schematic diagram and photos of the device are shown in Figure S1. The cell sampling system includes a sampling

pump and a cell sampling bottle. The cell suspension was introduced into the next part of the device through a capillary by creating a pressure difference between the inside and outside of the cell sampling bottle with the sampling pump. The online extraction system includes a coaxial capillary device, a high-voltage power supply, an injection pump and auxiliary gas. Cells were transmitted in single-cell form through the inner capillary. Methanol sheath liquid was injected through the in-between capillary at 20  $\mu\text{L}/\text{min}$  by the injection pump, and performed online extraction of the cell contents.  $\text{N}_2$  was chosen as the auxiliary gas and was transmitted through the outer capillary at the pressure of 0.4 MPa, quickly evaporating the solution. The distance between inner capillary and in-between capillary was optimized to 2 mm to adjust to the size of lymphocytes. An QE-Orbitrap MS from Thermo Fisher Scientific was used in the MS analysis system to analyze the cell metabolites. Dead volume is avoided in the whole process.

Since lymphocytes are smaller in size and more complex in composition compared with epithelial cells, the ability of the device to analyze complex samples needs to be evaluated. Unsorted PBMCs were used for preliminary experiment. The concentration of the cell suspension was  $5 \times 10^4$  cells/mL. Totally 679 cells were detected in 20 min, corresponding to 34 cells/min. The extracted ion chromatogram (EIC) of PC(34:1) ( $[\text{M}+\text{H}]^+$  760.58) representing cell events is shown in Figure S2a, proving that the optimized device has enough sensitivity for clinical samples. The heatmap of the retained 448 ions in cells after data processing indicates the complex composition of PBMCs (Figure S2b). To simulate the complex environment in human body, we established a cancer cell lines model by mixing HeLa cells and Hek293 cells at a ratio of 4:1. Then the sample was analyzed by MS, and 213 single-cell data with 170 HeLa cells and 43 Hek293 cells were obtained. As shown in Figure S2c-S2d, the metabolic information of different groups was visualized in the two-dimensional plane by UMAP algorithm, showing that 173 of them were HeLa cells and 40 of them were Hek293 cells in the mixed group, with the recovery rate of 102% and 93%. The results show that the optimized device is applicable for complex samples research. To further evaluate the stability of the device, sorted T cells and NK cells were used for clustering analysis, which showed great reliability of the discriminating results (Figure S3a-S3b).

## 1.5 Data Processing

We used SCMeTA (<https://www.sc-meta.com>) to process single-cell data. First, the raw file was imported into the software and extracted into matrix form. Then, the extracted data were filtered through preprocessing process. In positive ion mode,  $m/z$  760.58 is usually the peak with the highest intensity of all metabolites, and is commonly used to identify cell events, named refer  $m/z$ . Data with refer  $m/z$  intensity higher than a certain ratio of the maximum value were retained and considered as cell events. Peaks with high frequency of occurrence and signal-to-noise ratio greater than three in cell events were retained as ions. Further, two processing methods were used to normalize and standardize data, using refer  $m/z$  of each cell event for normalization or taking the logarithm base two of the absolute intensity of metabolites for standardization. Heatmap was used to visually display the differences in

metabolites between different groups and within groups in the processed data. Each column represents a single cell, each row represents an ion, and the color shows the content of the ion in the cell. The data processing software includes clustering analysis methods, such as Principal Component Analysis (PCA), t-distributed Stochastic Neighbor Embedding (t-SNE) and UMAP. UMAP was mainly used in this work. UMAP is a non-linear dimensionality reduction technique that preserves both the local and global structure of the data by approximating the manifold on which the data lies and projecting it to a lower-dimensional space. It is faster and more scalable than PCA and t-SNE.

## 1.6 Metabolites Annotation and Analysis

The ions retained after data processing were compared with HMDB using accurate mass measurement (<https://hmdb.ca/>). Forms such as  $[M+H]^+$  and  $[M+Na]^+$  were used to determine the existence form of ions in the positive mode. Some lipids with isomers were annotated by general names. Ions that did not match in HMDB were considered as exogenous interference ions and were deleted in the further analysis. The metabolic pathway difference analysis was performed in MetaboAnalyst 5.0 (<http://www.metaboanalyst.ca/>).

## 2. Supplementary Figures

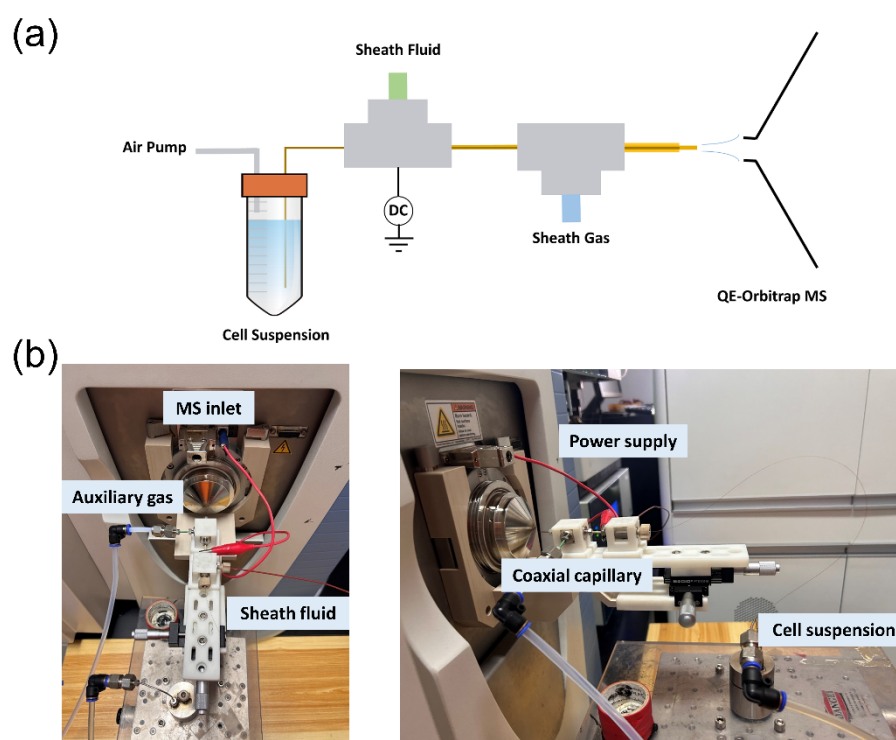

Figure S1. Schematic diagram and photos of the device. (a) Schematic diagram of the device. (b) Photos of the device showing its basic construction, including top view (left) and side view (right).

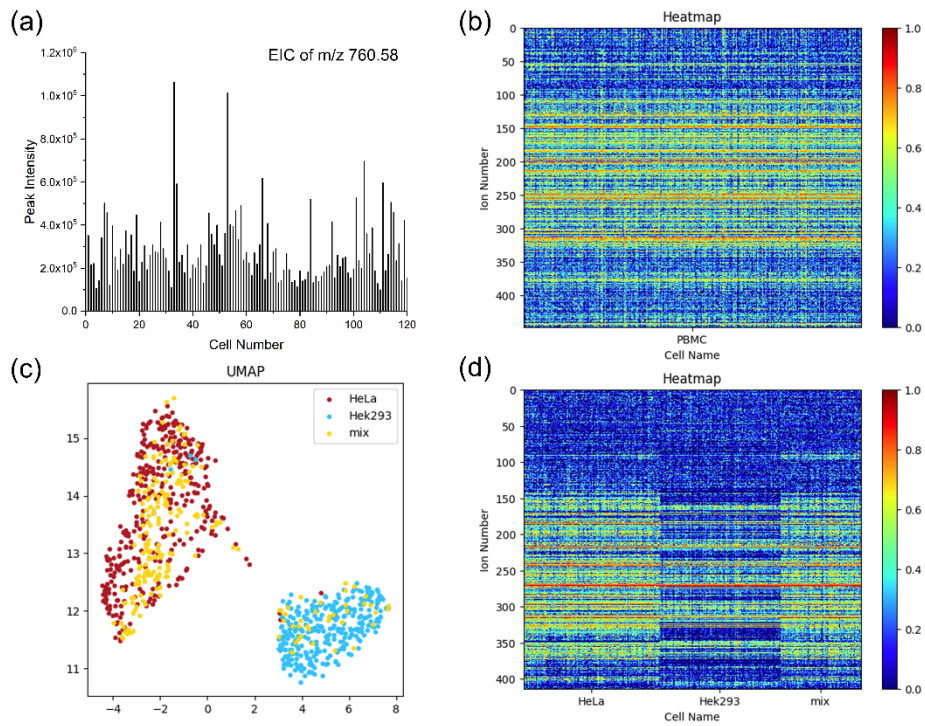

Figure S2. Acquisition of metabolite profiles from single cells. (a) EIC of PC (34:1) of PBMCs in the positive ion mode. (b) Heatmap of the ions detected in 679 PBMCs. (c) UMAP analysis of HeLa cells, Hek293 cells and mixed cells. (d) Heatmap of the ions detected in mixed cancer cells of Hek293 cells and HeLa cells.

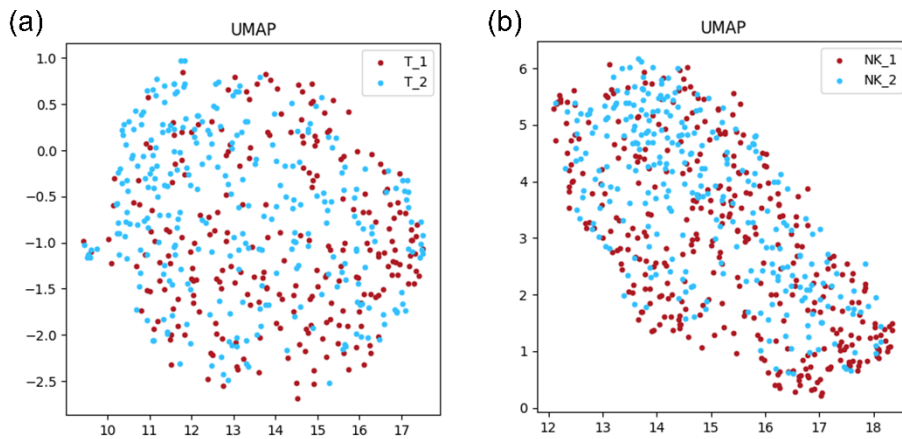

Figure S3. Proof of stability. (a) UMAP analysis of T cells from different batches. (b) UMAP analysis of NK cells from different batches.

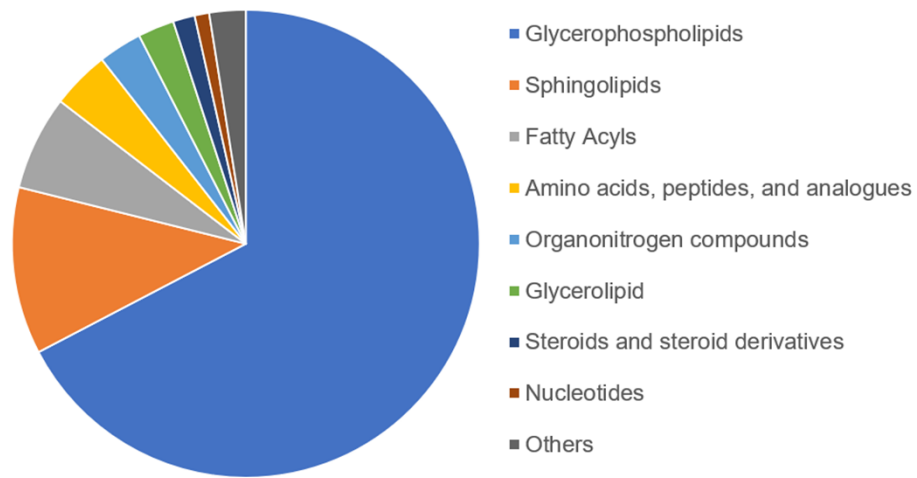

Figure S4. Classification of detected metabolites in lymphocytes in the positive mode.

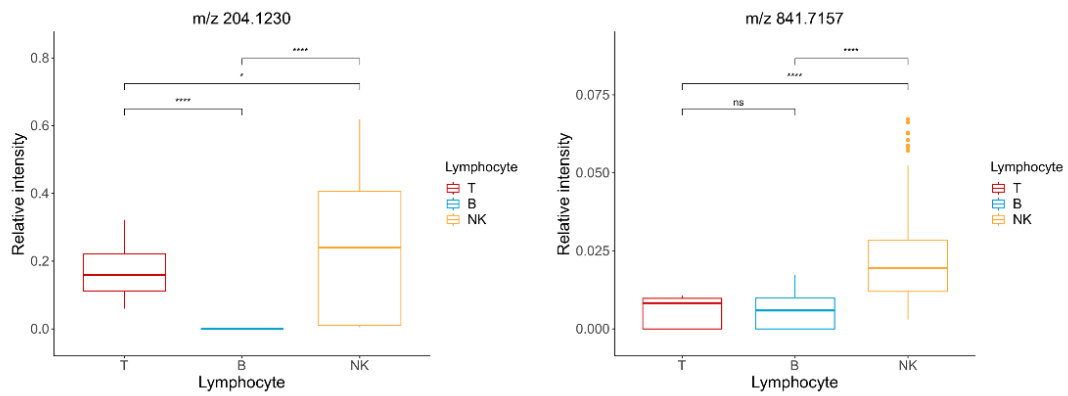

Figure S5. Distribution of acetylcarnitine (left) and SM(d44:2) (right) in T cells, B cells and NK cells.

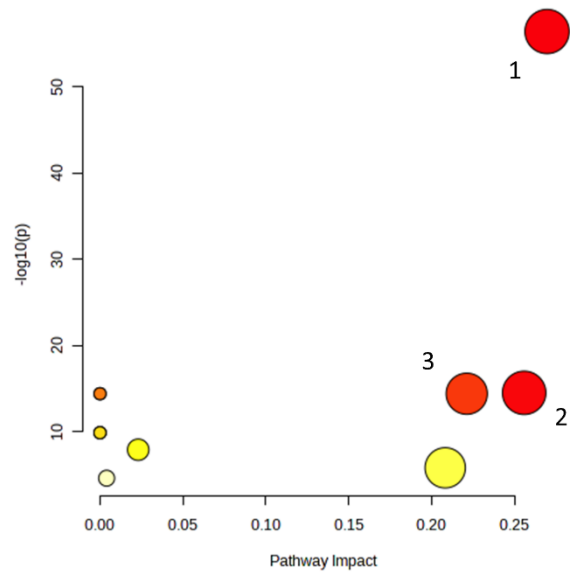

Figure S6. The metabolic pathway difference between T cells and B cells, including (1) spingophospholipid metabolism pathway, (2) glutathione metabolism pathway and (3) histidine metabolism pathway.

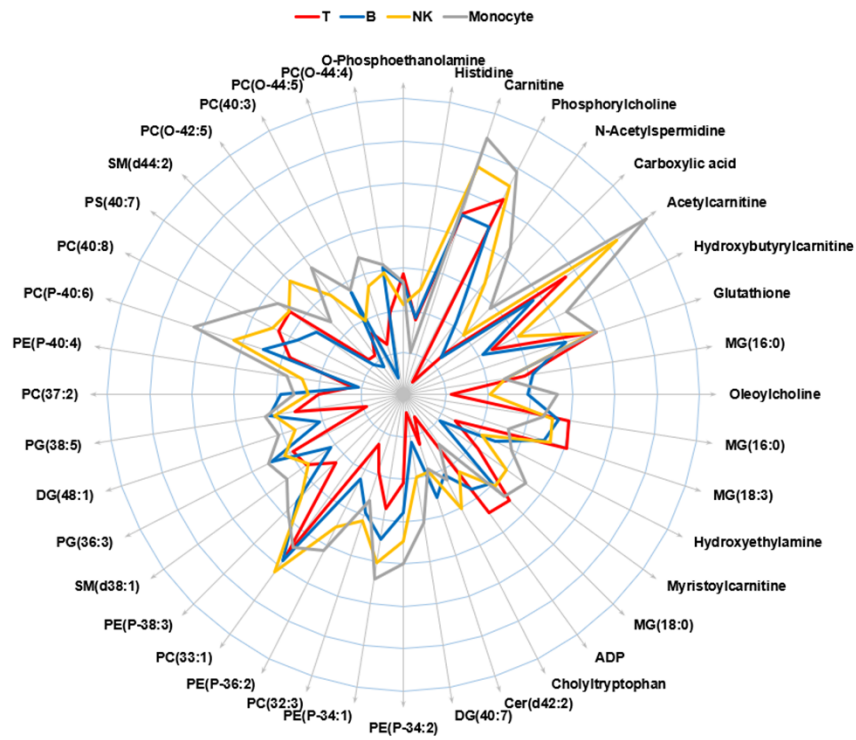

Figure S7. Logarithmic radar chart of 40 differential metabolites in T cells, B cells, NK cells and monocytes.



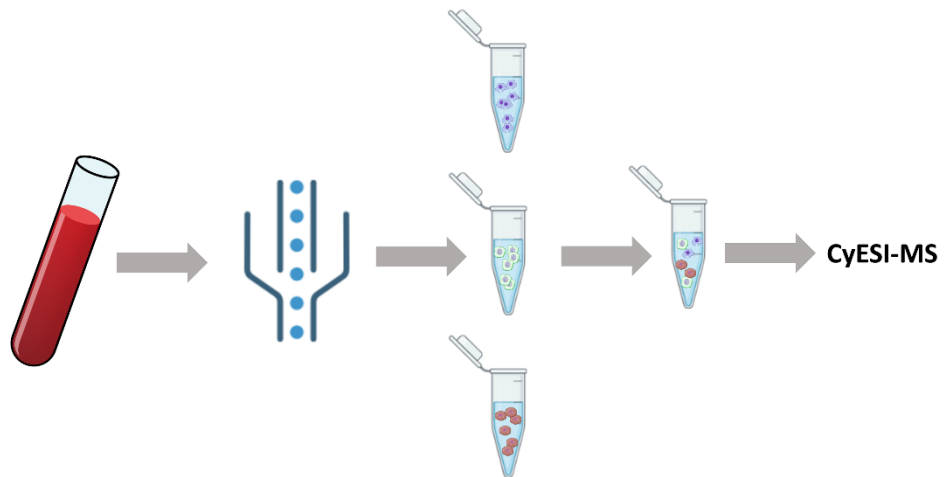

Figure S8. Schematic diagram of the procedure of preparing mixed lymphocytes.

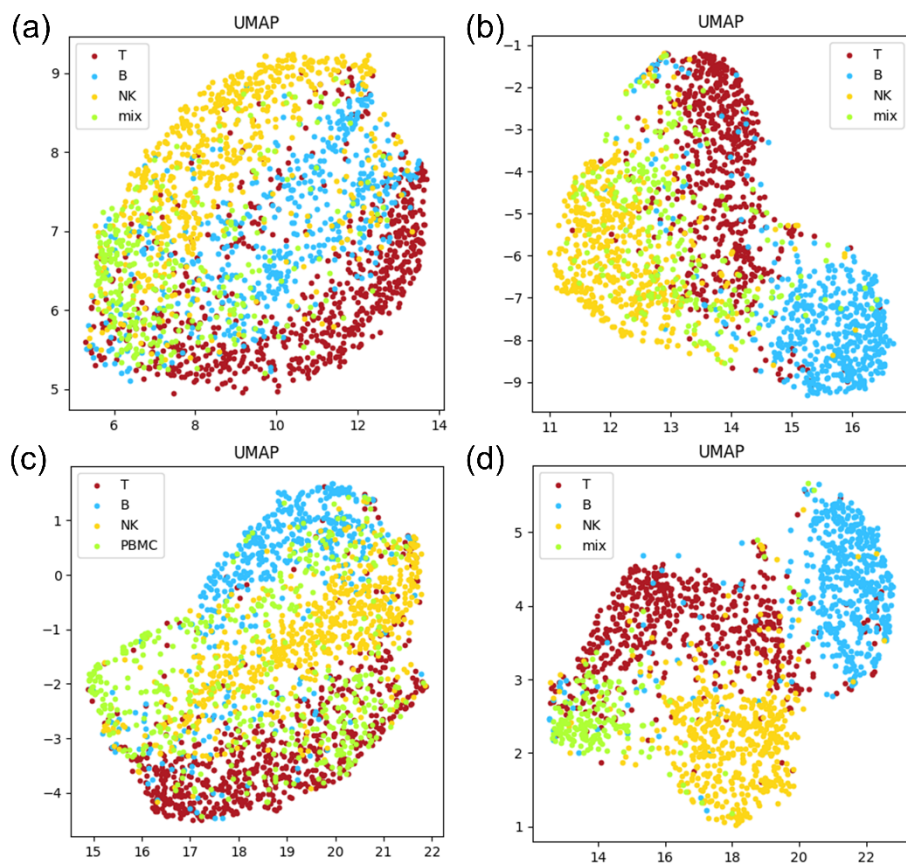

Figure S9. Proof of accuracy and repeatability. (a, b) UMAP analysis of mixed cells on the same day. (c) UMAP analysis of PBMC on the same day. (d) UMAP analysis of mixed cells on different days.

### 3. Supplementary Tables

Table S1. 177 metabolites assigned from lymphocytes at single-cell level in positive ion mode (scan range m/z 150-1000).

| No. | Metabolites assignment                           | Chemical formula | Observed mass, m/z | Theoretical mass, m/z | Formula   | Error, ppm |
|-----|--------------------------------------------------|------------------|--------------------|-----------------------|-----------|------------|
| 1   | Histidine                                        | C6H9N3O2         | 156.0772           | 156.0768              | M+H       | 2.56       |
| 2   | L-Carnitine                                      | C7H15NO3         | 162.1128           | 162.1125              | M+H       | 1.85       |
|     |                                                  |                  | 184.0947           | 184.0944              | M+Na      | 1.63       |
| 3   | O-Phosphoethanolamine                            | C2H8NO4P         | 164.0085           | 164.0083              | M+Na      | 1.22       |
| 4   | DL-Glutamate                                     | C5H9NO4          | 170.0424           | 170.0424              | M+Na      | 0.00       |
| 5   | Phosphorylcholine                                | C5H15NO4P        | 184.0737           | 184.0739              | M+H       | 1.09       |
| 6   | N-Acetylspermidine                               | C9H21N3O         | 188.1761           | 188.1757              | M+H       | 2.13       |
| 7   | 1,2,3,4-Tetrahydroisoquinoline-1-carboxylic acid | C10H11NO2        | 200.0686           | 200.0682              | M+Na      | 2.00       |
| 8   | Acetylcarnitine                                  | C9H17NO4         | 204.1234           | 204.1230              | M+H       | 1.96       |
| 9   | Phosphorylcholine                                | C5H15NO4P        | 206.0558           | 206.0558              | M+Na      | 0.00       |
| 10  | Orgothionine/Ergothioneine                       | C9H15N3O2S       | 230.0960           | 230.0958              | M+H       | 0.87       |
|     |                                                  |                  | 252.0781           | 252.0777              | M+Na      | 1.59       |
| 11  | Hydroxybutyrylcarnitine                          | C11H21NO5        | 248.1497           | 248.1492              | M+H       | 2.01       |
| 12  | 3-Methyl-5-pentyl-2-furanpentanoic acid          | C15H24O3         | 253.1802           | 253.1798              | M+H       | 1.58       |
| 13  | Palmitic amide                                   | C16H33NO         | 256.2633           | 256.2635              | M+H       | 0.78       |
| 14  | Glycerophosphorylcholine                         | C8H20NO6P        | 280.0916           | 280.0920              | M+Na      | 1.43       |
| 15  | Tyrosyl-Cysteine                                 | C12H16N2O4S      | 284.1064           | 284.1058              | M+NH4-H2O | 2.11       |
| 16  | hydroxyisovaleroyl carnitine                     | C12H23NO5        | 284.1474           | 284.1468              | M+Na      | 2.11       |
| 17  | Glutathione                                      | C10H17N3O6S      | 308.0911           | 308.0911              | M+H       | 0.00       |
|     |                                                  |                  | 330.0730           | 330.0730              | M+Na      | 0.00       |
| 18  | methylnonadecanoic acid                          | C20H40O2         | 330.3369           | 330.3367              | M+NH4     | 0.61       |
| 19  | MG(16:0/0:0/0:0)                                 | C19H38O4         | 331.2845           | 331.2843              | M+H       | 0.60       |
| 20  | Oleoylcholine                                    | C23H46NO2        | 332.3315           | 332.3323              | M+H-2H2O  | 2.41       |
| 21  | hydroxyphytanic acid                             | C20H40O3         | 346.3314           | 346.3316              | M+NH4     | 0.58       |
| 22  | AMP                                              | C10H14N5O7P      | 348.0706           | 348.0704              | M+H       | 0.57       |
| 23  | MG(16:0/0:0/0:0)                                 | C19H38O4         | 348.3106           | 348.3108              | M+NH4     | 0.57       |
| 24  | MG(18:3/0:0/0:0)                                 | C21H36O4         | 353.2671           | 353.2686              | M+H       | 4.25       |
| 25  | MG(18:0/0:0/0:0)                                 | C21H42O4         | 359.3161           | 359.3156              | M+H       | 1.39       |
|     |                                                  |                  | 381.2982           | 381.2975              | M+Na      | 1.84       |

|    |                                             |               |          |          |          |      |
|----|---------------------------------------------|---------------|----------|----------|----------|------|
| 26 | (5Z,7E)-9,10-Seco-5,7,10(19)-cholestatriene | C27H44        | 369.3522 | 369.3516 | M+H      | 1.62 |
| 27 | Myristoylcarnitine                          | C21H41NO4     | 372.3110 | 372.3108 | M+H      | 0.54 |
| 28 | Hydroxydocosanoic acid                      | C22H44O3      | 374.3632 | 374.3629 | M+NH4    | 0.80 |
| 29 | Palmitoylcarnitine                          | C23H45NO4     | 400.3425 | 400.3421 | M+H      | 1.00 |
| 30 | Pentacosanoylglycine                        | C27H53NO3     | 404.3893 | 404.3898 | M+H-2H2O | 1.24 |
| 31 | ADP                                         | C10H15N5O10P2 | 428.0363 | 428.0367 | M+H      | 0.93 |
| 32 | LysoPC(16:0/0:0)                            | C24H50NO7P    | 496.3403 | 496.3398 | M+H      | 1.01 |
| 33 | LysoPC(18:3/0:0)                            | C26H48NO7P    | 518.3226 | 518.3241 | M+H      | 2.89 |
| 34 | LysoPC(18:1/0:0)                            | C26H52NO7P    | 522.3568 | 522.3554 | M+H      | 2.68 |
| 35 | LysoPC(18:0/0:0)                            | C26H54NO7P    | 524.3721 | 524.3711 | M+H      | 1.91 |
| 36 | Cer(d18:1/16:0)                             | C34H67NO3     | 538.5193 | 538.5194 | M+H      | 0.19 |
|    |                                             |               | 560.5009 | 560.5013 | M+Na     | 0.71 |
| 37 | LysoPC(20:4/0:0)                            | C28H50NO7P    | 544.3395 | 544.3398 | M+H      | 0.55 |
| 38 | LysoPC(20:3/0:0)                            | C28H52NO7P    | 546.3546 | 546.3554 | M+H      | 1.46 |
| 39 | Cholyltryptophan                            | C35H50N2O6    | 577.3647 | 577.3642 | M+H-H2O  | 0.87 |
| 40 | DG(38:4)                                    | C41H72O5      | 627.5350 | 627.5353 | M+H-H2O  | 0.48 |
| 41 | Cer(d42:2)                                  | C42H81NO3     | 648.6293 | 648.6289 | M+H      | 0.62 |
| 42 | DG(40:7)                                    | C43H70O5      | 667.5289 | 667.5296 | M+H      | 1.05 |
| 43 | SM(d32:1)                                   | C37H75N2O6P   | 675.5441 | 675.5436 | M+H      | 0.74 |
| 44 | SM(d33:1)                                   | C38H77N2O6P   | 689.5603 | 689.5592 | M+H      | 1.60 |
| 45 | PE(P-34:2)                                  | C39H74NO7P    | 700.5281 | 700.5276 | M+H      | 0.71 |
| 46 | SM(d34:2)                                   | C39H77N2O6P   | 701.5605 | 701.5592 | M+H      | 1.85 |
| 47 | PE(P-34:1)                                  | C39H76NO7P    | 702.5430 | 702.5432 | M+H      | 0.28 |
| 48 | SM(d34:1)                                   | C39H79N2O6P   | 703.5763 | 703.5749 | M+H      | 1.99 |
| 49 | PC(30:0)                                    | C38H76NO8P    | 706.5393 | 706.5381 | M+H      | 1.70 |
| 50 | PE(34:2)                                    | C39H74NO8P    | 716.5225 | 716.5225 | M+H      | 0.00 |
| 51 | SM(d35:1)                                   | C40H81N2O6P   | 717.5915 | 717.5905 | M+H      | 1.39 |
| 52 | PC(31:1)                                    | C39H76NO8P    | 718.5388 | 718.5381 | M+H      | 0.97 |
| 53 | PC(O-32:0)                                  | C40H80NO7P    | 718.5757 | 718.5745 | M+H      | 1.67 |
| 54 | PC(31:0)                                    | C39H78NO8P    | 720.5555 | 720.5538 | M+H      | 2.36 |
| 55 | DG(41:3-2OH)                                | C44H80O7      | 721.5950 | 721.5977 | M+H      | 3.74 |
| 56 | PE(P-36:4)                                  | C41H74NO7P    | 724.5281 | 724.5276 | M+H      | 0.69 |
| 57 | PC(32:3)                                    | C40H74NO8P    | 728.5220 | 728.5225 | M+H      | 0.69 |
| 58 | PE(P-36:2)                                  | C41H78NO7P    | 728.5593 | 728.5589 | M+H      | 0.55 |
| 59 | SM(d36:2)                                   | C41H81N2O6P   | 729.5912 | 729.5905 | M+H      | 0.96 |
| 60 | PC(32:2)                                    | C40H76NO8P    | 730.5391 | 730.5381 | M+H      | 1.37 |

|    |            |             |          |          |      |      |
|----|------------|-------------|----------|----------|------|------|
| 61 | PC(P-33:1) | C41H80NO7P  | 730.5741 | 730.5745 | M+H  | 0.55 |
| 62 | SM(d36:1)  | C41H83N2O6P | 731.6081 | 731.6062 | M+H  | 2.60 |
|    |            |             | 753.5892 | 753.5881 | M+Na | 1.46 |
| 63 | PC(32:1)   | C40H78NO8P  | 732.5549 | 732.5538 | M+H  | 1.50 |
| 64 | PC(32:0)   | C40H80NO8P  | 734.5703 | 734.5694 | M+H  | 1.23 |
| 65 | PC(P-34:4) | C42H76NO7P  | 738.5441 | 738.5432 | M+H  | 1.22 |
| 66 | PC(33:4)   | C41H74NO8P  | 740.5242 | 740.5225 | M+H  | 2.30 |
| 67 | PC(P-34:3) | C42H78NO7P  | 740.5580 | 740.5589 | M+H  | 1.22 |
| 68 | PC(33:3)   | C41H76NO8P  | 742.5382 | 742.5381 | M+H  | 0.13 |
| 69 | PC(P-34:2) | C42H80NO7P  | 742.5742 | 742.5745 | M+H  | 0.40 |
| 70 | PC(33:2)   | C41H78NO8P  | 744.5544 | 744.5538 | M+H  | 0.81 |
| 71 | PC(P-34:1) | C42H82NO7P  | 744.5901 | 744.5902 | M+H  | 0.13 |
| 72 | PC(33:1)   | C41H80NO8P  | 746.5699 | 746.5694 | M+H  | 0.67 |
| 73 | PC(P-34:0) | C42H84NO7P  | 746.6072 | 746.6058 | M+H  | 1.88 |
| 74 | PG(34:2)   | C40H75O10P  | 747.5157 | 747.5171 | M+H  | 1.87 |
| 75 | PE(P-38:6) | C43H74NO7P  | 748.5287 | 748.5276 | M+H  | 1.47 |
|    |            |             | 770.5107 | 770.5095 | M+Na | 1.56 |
| 76 | PC(33:0)   | C41H82NO8P  | 748.5834 | 748.5851 | M+H  | 2.27 |
| 77 | PC(O-34:0) | C42H86NO7P  | 748.6215 | 748.6215 | M+H  | 0.00 |
| 78 | PG(34:1)   | C40H77O10P  | 749.5323 | 749.5327 | M+H  | 0.53 |
| 79 | PE(P-38:5) | C43H76NO7P  | 750.5440 | 750.5432 | M+H  | 1.07 |
|    |            |             | 772.5262 | 772.5252 | M+Na | 1.29 |
| 80 | PG(34:0)   | C40H79O10P  | 751.5472 | 751.5484 | M+H  | 1.60 |
| 81 | PE(P-38:4) | C43H78NO7P  | 752.5602 | 752.5589 | M+H  | 1.73 |
| 82 | PC(34:4)   | C42H76NO8P  | 754.5372 | 754.5381 | M+H  | 1.19 |
| 83 | PE(P-38:3) | C43H80NO7P  | 754.5694 | 754.5745 | M+H  | 6.76 |
| 84 | PC(34:3)   | C42H78NO8P  | 756.5528 | 756.5538 | M+H  | 1.32 |
| 85 | PC(34:2)   | C42H80NO8P  | 758.5710 | 758.5694 | M+H  | 2.11 |
| 86 | SM(d38:1)  | C43H87N2O6P | 759.6378 | 759.6375 | M+H  | 0.39 |
| 87 | PC(34:1)   | C42H82NO8P  | 760.5851 | 760.5851 | M+H  | 0.00 |
| 88 | PE(38:6)   | C43H74NO8P  | 764.5230 | 764.5225 | M+H  | 0.65 |
| 89 | PC(35:5)   | C43H76NO8P  | 766.5386 | 766.5381 | M+H  | 0.65 |
| 90 | PC(P-36:4) | C44H80NO7P  | 766.5748 | 766.5745 | M+H  | 0.39 |
|    |            |             | 788.5530 | 788.5565 | M+Na | 4.44 |
| 91 | PC(35:4)   | C43H78NO8P  | 768.5548 | 768.5538 | M+H  | 1.30 |
| 92 | PC(P-36:3) | C44H82NO7P  | 768.5912 | 768.5902 | M+H  | 1.30 |
| 93 | PC(35:3)   | C43H80NO8P  | 770.5688 | 770.5694 | M+H  | 0.78 |
| 94 | PC(P-36:2) | C44H84NO7P  | 770.6049 | 770.6058 | M+H  | 1.17 |
| 95 | PC(35:2)   | C43H82NO8P  | 772.5856 | 772.5851 | M+H  | 0.65 |
| 96 | PC(P-36:1) | C44H86NO7P  | 772.6203 | 772.6215 | M+H  | 1.55 |

|     |            |             |          |          |      |      |
|-----|------------|-------------|----------|----------|------|------|
| 97  | PG(36:3)   | C42H77O10P  | 773.5306 | 773.5327 | M+H  | 2.71 |
| 98  | PE(P-40:7) | C45H76NO7P  | 774.5433 | 774.5432 | M+H  | 0.13 |
|     |            |             | 796.5271 | 796.5252 | M+Na | 2.39 |
| 99  | PC(35:1)   | C43H84NO8P  | 774.6006 | 774.6007 | M+H  | 0.13 |
| 100 | PC(P-36:0) | C44H88NO7P  | 774.6372 | 774.6371 | M+H  | 0.13 |
|     |            |             | 796.6210 | 796.6191 | M+Na | 2.39 |
| 101 | PG(36:2)   | C42H79O10P  | 775.5466 | 775.5484 | M+H  | 2.32 |
| 102 | PE(P-40:6) | C45H78NO7P  | 776.5590 | 776.5589 | M+H  | 0.13 |
|     |            |             | 798.5417 | 798.5408 | M+Na | 1.13 |
| 103 | PG(36:1)   | C42H81O10P  | 777.5630 | 777.5640 | M+H  | 1.29 |
| 104 | PE(P-40:5) | C45H80NO7P  | 778.5754 | 778.5745 | M+H  | 1.16 |
|     |            |             | 800.5568 | 800.5565 | M+Na | 0.37 |
| 105 | PG(36:0)   | C42H83O10P  | 779.5795 | 779.5797 | M+H  | 0.26 |
| 106 | PC(36:5)   | C44H78NO8P  | 780.5529 | 780.5538 | M+H  | 1.15 |
| 107 | PE(P-38:1) | C43H84NO7P  | 780.5892 | 780.5878 | M+Na | 1.79 |
| 108 | PC(36:4)   | C44H80NO8P  | 782.5698 | 782.5694 | M+H  | 0.51 |
| 109 | PC(36:3)   | C44H82NO8P  | 784.5850 | 784.5851 | M+H  | 0.13 |
|     |            |             | 806.5678 | 806.5670 | M+Na | 0.99 |
| 110 | SM(d40:2)  | C45H89N2O6P | 785.6523 | 785.6531 | M+H  | 1.02 |
| 111 | PC(36:2)   | C44H84NO8P  | 786.6019 | 786.6007 | M+H  | 1.53 |
| 112 | SM(d40:1)  | C45H91N2O6P | 787.6693 | 787.6688 | M+H  | 0.63 |
|     |            |             | 809.6503 | 809.6507 | M+Na | 0.49 |
| 113 | PS(36:2)   | C42H78NO10P | 788.5466 | 788.5436 | M+H  | 3.80 |
| 114 | PC(36:1)   | C44H86NO8P  | 788.6169 | 788.6164 | M+H  | 0.63 |
| 115 | PS(36:1)   | C42H80NO10P | 790.5623 | 790.5593 | M+H  | 3.79 |
| 116 | DG(48:1)   | C51H98O5    | 791.7484 | 791.7487 | M+H  | 0.38 |
| 117 | PC(37:6)   | C45H78NO8P  | 792.5562 | 792.5538 | M+H  | 3.03 |
| 118 | PC(P-38:5) | C46H82NO7P  | 792.5902 | 792.5902 | M+H  | 0.00 |
| 119 | PG(37:0)   | C43H85O10P  | 793.5943 | 793.5953 | M+H  | 1.26 |
| 120 | PC(37:5)   | C45H80NO8P  | 794.5701 | 794.5694 | M+H  | 0.88 |
| 121 | PC(P-38:4) | C46H84NO7P  | 794.6061 | 794.6058 | M+H  | 0.38 |
| 122 | PC(37:4)   | C45H82NO8P  | 796.5843 | 796.5851 | M+H  | 1.00 |
| 123 | PG(38:5)   | C44H77O10P  | 797.5316 | 797.5327 | M+H  | 1.38 |
| 124 | PC(35:0)   | C43H86NO8P  | 798.5967 | 798.5983 | M+Na | 2.00 |
| 125 | PC(P-38:2) | C46H88NO7P  | 798.6369 | 798.6371 | M+H  | 0.25 |
| 126 | PG(38:4)   | C44H79O10P  | 799.5448 | 799.5484 | M+H  | 4.50 |
| 127 | PC(37:2)   | C45H86NO8P  | 800.6153 | 800.6164 | M+H  | 1.37 |
| 128 | PC(P-38:1) | C46H90NO7P  | 800.6530 | 800.6528 | M+H  | 0.25 |
| 129 | SM(d41:1)  | C46H93N2O6P | 801.6835 | 801.6844 | M+H  | 1.12 |
| 130 | PE(P-40:4) | C45H82NO7P  | 802.5723 | 802.5721 | M+Na | 0.25 |

|     |            |             |          |          |      |      |
|-----|------------|-------------|----------|----------|------|------|
| 131 | PC(38:7)   | C46H78NO8P  | 804.5532 | 804.5538 | M+H  | 0.75 |
| 132 | PC(38:6)   | C46H80NO8P  | 806.5671 | 806.5694 | M+H  | 2.85 |
| 133 | PC(38:5)   | C46H82NO8P  | 808.5848 | 808.5851 | M+H  | 0.37 |
| 134 | PC(38:4)   | C46H84NO8P  | 810.6008 | 810.6007 | M+H  | 0.12 |
| 135 | SM(d42:3)  | C47H91N2O6P | 811.6695 | 811.6688 | M+H  | 0.86 |
|     |            |             | 833.6502 | 833.6507 | M+Na | 0.60 |
| 136 | PS(38:4)   | C44H78NO10P | 812.5453 | 812.5436 | M+H  | 2.09 |
| 137 | PC(38:3)   | C46H86NO8P  | 812.6150 | 812.6164 | M+H  | 1.72 |
| 138 | SM(d42:2)  | C47H93N2O6P | 813.6846 | 813.6844 | M+H  | 0.25 |
|     |            |             | 835.6667 | 835.6663 | M+Na | 0.48 |
| 139 | PS(38:3)   | C44H80NO10P | 814.5591 | 814.5593 | M+H  | 0.25 |
| 140 | PC(38:2)   | C46H88NO8P  | 814.6306 | 814.6320 | M+H  | 1.72 |
| 141 | SM(d42:1)  | C47H95N2O6P | 815.6994 | 815.7001 | M+H  | 0.86 |
|     |            |             | 837.6820 | 837.6820 | M+Na | 0.00 |
| 142 | PC(P-40:7) | C48H82NO7P  | 816.5894 | 816.5902 | M+H  | 0.98 |
| 143 | PC(38:1)   | C46H90NO8P  | 816.6483 | 816.6477 | M+H  | 0.73 |
| 144 | PC(P-40:6) | C48H84NO7P  | 818.6047 | 818.6058 | M+H  | 1.34 |
| 145 | PC(P-40:5) | C48H86NO7P  | 820.6217 | 820.6215 | M+H  | 0.24 |
| 146 | PC(P-40:4) | C48H88NO7P  | 822.6370 | 822.6371 | M+H  | 0.12 |
| 147 | PC(P-40:3) | C48H90NO7P  | 824.6524 | 824.6528 | M+H  | 0.49 |
| 148 | PC(P-40:3) | C48H90NO7P  | 846.6333 | 846.6347 | M+Na | 1.65 |
| 149 | PG(40:5)   | C46H81O10P  | 825.5602 | 825.5640 | M+H  | 4.60 |
| 150 | PC(P-40:2) | C48H92NO7P  | 826.6683 | 826.6684 | M+H  | 0.12 |
|     |            |             | 848.6512 | 848.6504 | M+Na | 0.94 |
| 151 | PC(40:9)   | C48H78NO8P  | 828.5530 | 828.5538 | M+H  | 0.97 |
| 152 | PC(P-40:1) | C48H94NO7P  | 828.6827 | 828.6841 | M+H  | 1.69 |
| 153 | PC(40:8)   | C48H80NO8P  | 830.5696 | 830.5694 | M+H  | 0.24 |
| 154 | PC(40:7)   | C48H82NO8P  | 832.5840 | 832.5851 | M+H  | 1.32 |
| 155 | PS(40:7)   | C46H76NO10P | 834.5271 | 834.5280 | M+H  | 1.08 |
| 156 | PC(40:6)   | C48H84NO8P  | 834.6005 | 834.6007 | M+H  | 0.24 |
| 157 | PS(40:6)   | C46H78NO10P | 836.5455 | 836.5436 | M+H  | 2.27 |
| 158 | PC(40:5)   | C48H86NO8P  | 836.6168 | 836.6164 | M+H  | 0.48 |
|     |            |             | 858.6002 | 858.5983 | M+Na | 2.21 |
| 159 | PI(34:1)   | C43H81O13P  | 837.5486 | 837.5488 | M+H  | 0.24 |
| 160 | PS(40:5)   | C46H80NO10P | 838.5595 | 838.5593 | M+H  | 0.24 |
| 161 | PC(40:4)   | C48H88NO8P  | 838.6302 | 838.6320 | M+H  | 2.15 |
| 162 | PI(34:0)   | C43H83O13P  | 839.5637 | 839.5644 | M+H  | 0.83 |
| 163 | PS(40:4)   | C46H82NO10P | 840.5743 | 840.5749 | M+H  | 0.71 |
| 164 | PC(38:0)   | C46H92NO8P  | 840.6442 | 840.6453 | M+Na | 1.31 |
| 165 | SM(d44:2)  | C49H97N2O6P | 841.7151 | 841.7157 | M+H  | 0.71 |

|     |            |            |          |          |      |      |
|-----|------------|------------|----------|----------|------|------|
| 166 | PG(42:8)   | C48H79O10P | 847.5479 | 847.5484 | M+H  | 0.59 |
| 167 | PC(O-42:5) | C50H92NO7P | 850.6668 | 850.6684 | M+H  | 1.88 |
| 168 | PC(O-42:4) | C50H94NO7P | 852.6851 | 852.6841 | M+H  | 1.17 |
| 169 | PC(42:10)  | C50H80NO8P | 854.5698 | 854.5694 | M+H  | 0.47 |
| 170 | PC(42:9)   | C50H82NO8P | 856.5849 | 856.5851 | M+H  | 0.23 |
| 171 | PC(42:7)   | C50H86NO8P | 860.6153 | 860.6164 | M+H  | 1.28 |
| 172 | PC(40:3)   | C48H90NO8P | 862.6285 | 862.6296 | M+Na | 1.28 |
| 173 | PC(O-44:6) | C52H94NO7P | 876.6850 | 876.6841 | M+H  | 1.03 |
| 174 | PC(O-44:5) | C52H96NO7P | 878.7000 | 878.6997 | M+H  | 0.34 |
| 175 | PC(O-44:4) | C52H98NO7P | 880.7172 | 880.7154 | M+H  | 2.04 |
| 176 | PI(38:4)   | C47H83O13P | 887.5659 | 887.5644 | M+H  | 1.69 |
|     |            |            | 909.5466 | 909.5463 | M+Na | 0.33 |
| 177 | PC(44:9)   | C52H86NO8P | 906.6007 | 906.5983 | M+Na | 2.65 |

Table S2. Repeated results of percentage calculation of lymphocytes.

|                  | Cell name | Actual Percentage (%) | Calculated Percentage (%) | Error (%)  |
|------------------|-----------|-----------------------|---------------------------|------------|
| Repeated group 1 | T         | 35.00                 | 33.23~36.92               | -1.77~1.92 |
|                  | B         | 25.00                 | 24.31~26.77               | -0.69~1.77 |
|                  | NK        | 40.00                 | 40.62~42.46               | 0.62~2.46  |
| Repeated group 2 | T         | 35.00                 | 32.31~35.00               | -2.69~0.00 |
|                  | B         | 15.00                 | 12.69~16.15               | -2.31~1.15 |
|                  | NK        | 50.00                 | 46.54~50.77               | -3.46~0.77 |
| Repeated group 3 | T         | 53.19                 | 50.44~56.64               | -2.75~3.45 |
|                  | B         | 15.34                 | 14.45~18.88               | -0.89~3.54 |
|                  | NK        | 31.48                 | 30.97~37.46               | -0.51~5.98 |
| Repeated group 4 | T         | 70.00                 | 72.92~79.17               | 2.92~9.17  |
|                  | B         | 0.00                  | 0.52~2.08                 | 0.52~2.08  |
|                  | NK        | 30.00                 | 26.04~32.29               | -3.96~2.29 |

Table S3. Results of calculation of CD4/CD8 ratio.

|             | Actual value | Calculated value | Error      |
|-------------|--------------|------------------|------------|
| Mixed cells | 2            | 1.80~2.16        | -0.20~0.16 |
| PBMCs       | 1.77         | 1.48~1.84        | -0.29~0.07 |
