# Supplementary figures and images for: Single-cell metabolite profiling enables information-rich classification of lymphocyte types and subtypes
Source: Royal Society of Chemistry journal article supplement (doi:10.1039/d3cc05011d), 2023-12-06

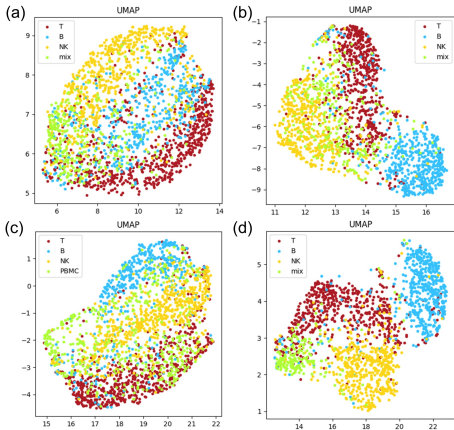

Supplement: d3cc05011d10.pdf [file d3cc05011d10.pdf]

(a)

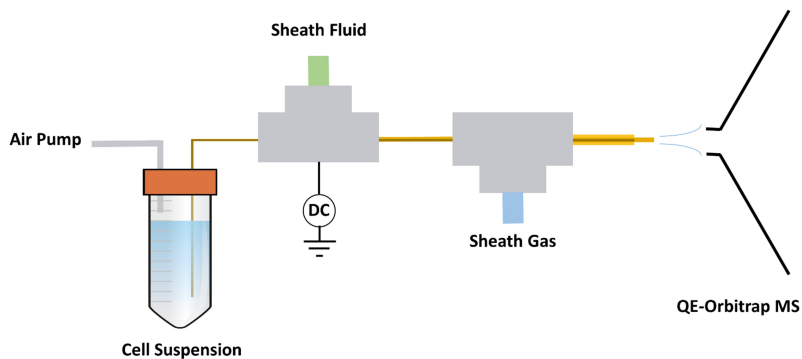

(b)

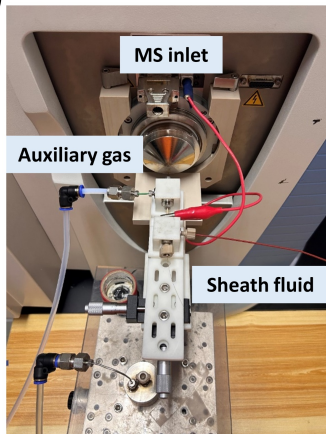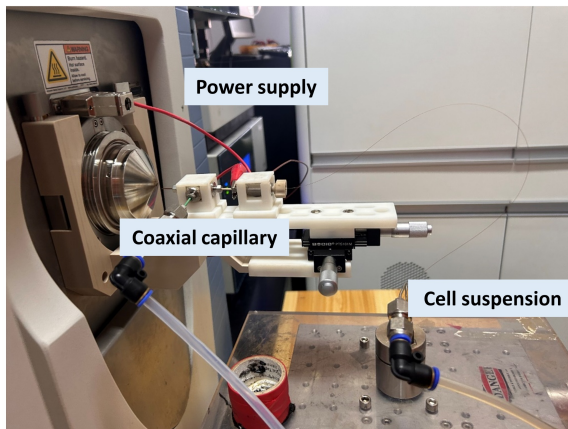

Supplement: d3cc05011d2.pdf [file d3cc05011d2.pdf]

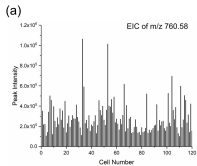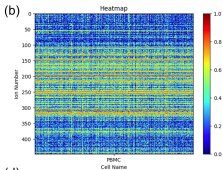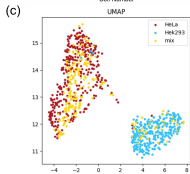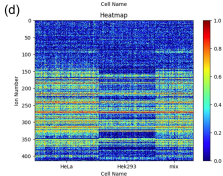

Supplement: d3cc05011d3.pdf [file d3cc05011d3.pdf]

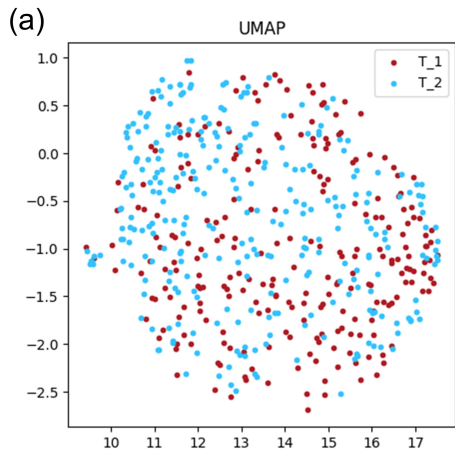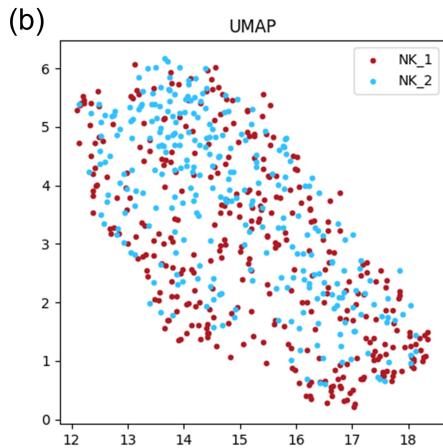

Supplement: d3cc05011d4.pdf [file d3cc05011d4.pdf]

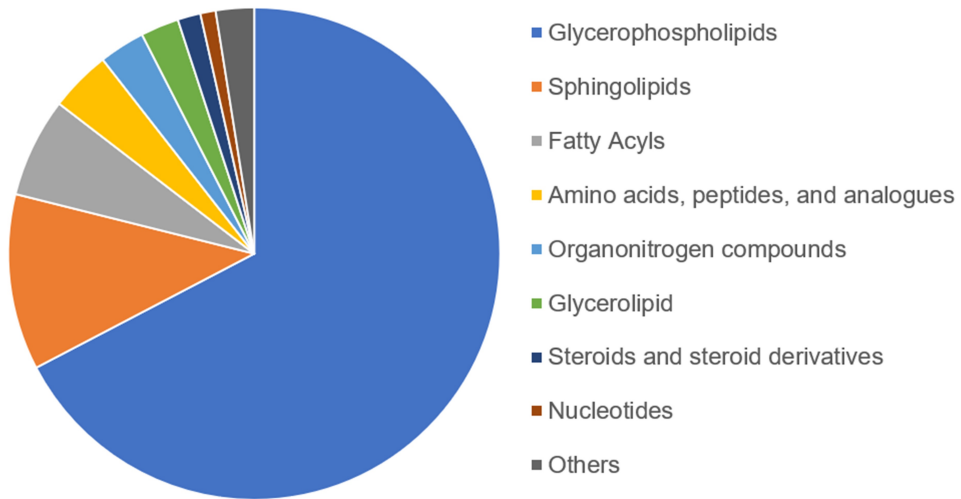

Supplement: d3cc05011d5.pdf [file d3cc05011d5.pdf]

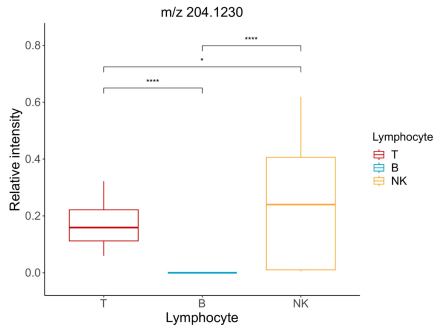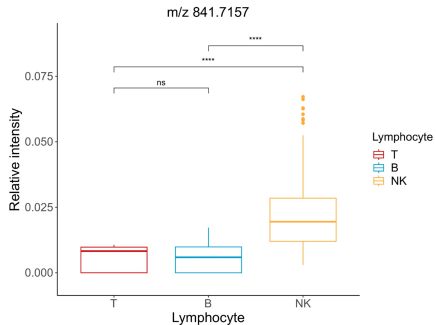

Supplement: d3cc05011d6.pdf [file d3cc05011d6.pdf]

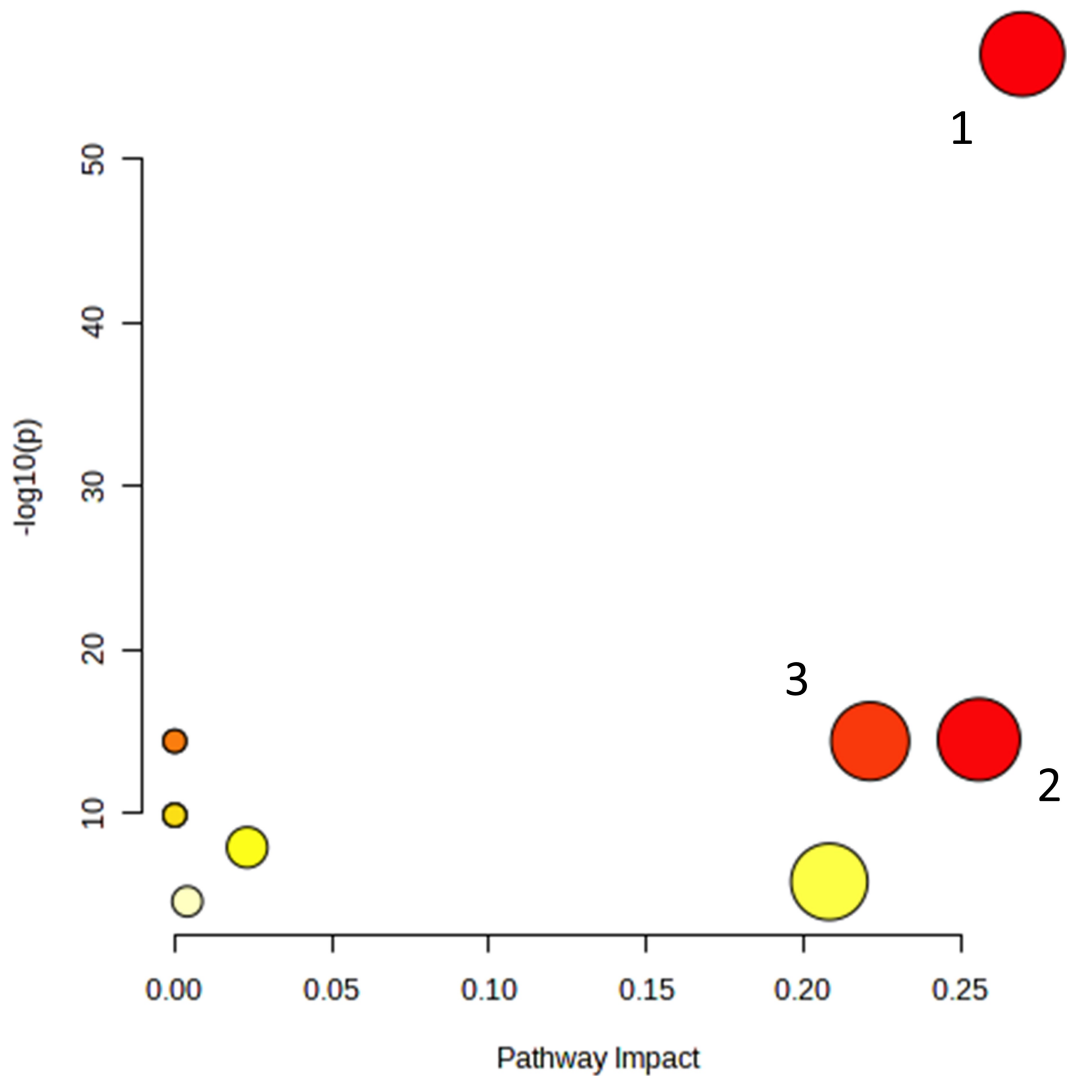

Supplement: d3cc05011d7.pdf [file d3cc05011d7.pdf]

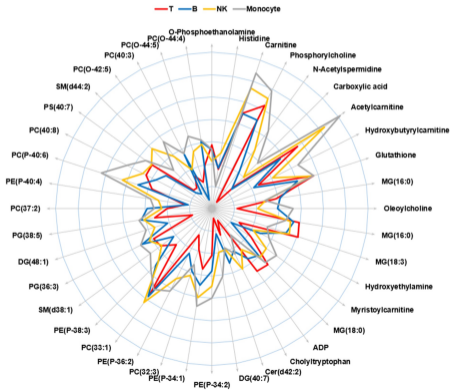

Supplement: d3cc05011d8.pdf [file d3cc05011d8.pdf]

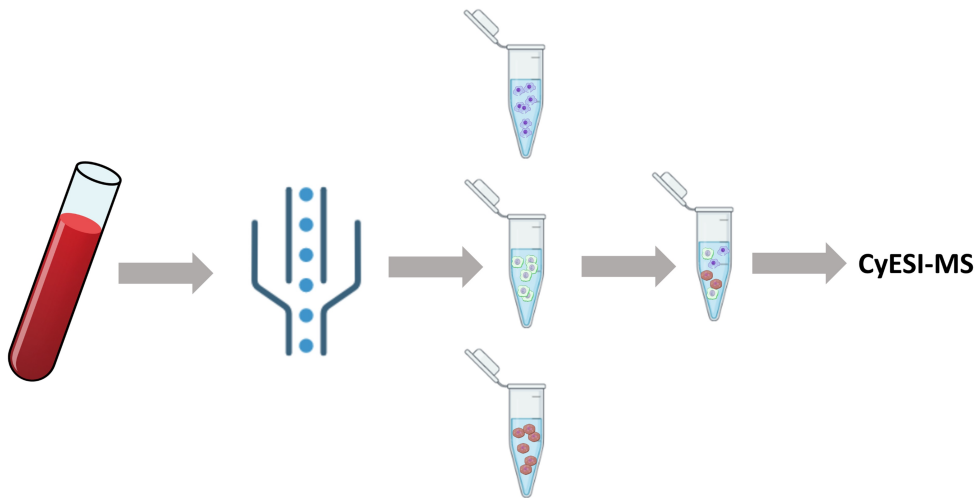

Supplement: d3cc05011d9.pdf [file d3cc05011d9.pdf]
